# Supplementary material
Source: publisher figshare collection journal article supplement (https://tandf.figshare.com/articles/dataset/_/21357341)
Supplement: Supplementary file 1 [file 1]

| Distribution of testing methods across included hospital laboratories | Overall, N = 4,228 <sup>1</sup> | Lillebaelt Hospital, N = 292 <sup>1</sup> | Odense University Hospital, N = 1,047 <sup>1</sup> | Rigshospitalet, N = 1,390 <sup>1</sup> | Zealand University Hospital, N = 661 <sup>1</sup> | Aalborg University Hospital, N = 445 <sup>1</sup> | Aarhus University Hospital, N = 393 <sup>1</sup> |
|-----------------------------------------------------------------------|---------------------------------|-------------------------------------------|----------------------------------------------------|----------------------------------------|---------------------------------------------------|---------------------------------------------------|--------------------------------------------------|
| Only DPYD-genotype                                                    | 1,968 (47%)                     | 81 (28%)                                  | 840 (80%)                                          | 89 (6.4%)                              | 455 (69%)                                         | 445 (100%)                                        | 58 (15%)                                         |
| Only DPD-phenotype [U]                                                | 17 (0.4%)                       | 17 (5.8%)                                 | 0 (0%)                                             | 0 (0%)                                 | 0 (0%)                                            | 0 (0%)                                            | 0 (0%)                                           |
| DPYD-genotype + DPD-phenotype [U]                                     | 2,243 (53%)                     | 194 (66%)                                 | 207 (20%)                                          | 1,301 (94%)                            | 206 (31%)                                         | 0 (0%)                                            | 335 (85%)                                        |
| <sup>1</sup> n (%)                                                    |                                 |                                           |                                                    |                                        |                                                   |                                                   |                                                  |

<sup>1</sup> n (%)
