# Supplementary material
Source: publisher figshare collection journal article supplement (https://tandf.figshare.com/articles/dataset/_/21357341)
Supplement: Supplementary file 2 [file 1]

| DPYD-genotype distribution across included hospital laboratories | Overall, N = 4,215 <sup>1</sup> | Lillebaelt Hospital, N = 275 <sup>1</sup> | Odense University Hospital, N = 1,051 <sup>1</sup> | Rigshospitalet, N = 1,390 <sup>1</sup> | Zealand University Hospital, N = 661 <sup>1</sup> | Aalborg University Hospital, N = 445 <sup>1</sup> | Aarhus University Hospital, N = 393 <sup>1</sup> |
|------------------------------------------------------------------|---------------------------------|-------------------------------------------|----------------------------------------------------|----------------------------------------|---------------------------------------------------|---------------------------------------------------|--------------------------------------------------|
| DPYD-genotype                                                    |                                 |                                           |                                                    |                                        |                                                   |                                                   |                                                  |
| Wild type                                                        | 3,895 (92%)                     | 255 (93%)                                 | 960 (91%)                                          | 1,288 (93%)                            | 611 (92%)                                         | 418 (94%)                                         | 363 (92%)                                        |
| HapB3                                                            | 208 (4.9%)                      | 12 (4.4%)                                 | 59 (5.6%)                                          | 67 (4.8%)                              | 33 (5.0%)                                         | 18 (4.0%)                                         | 19 (4.8%)                                        |
| D949V                                                            | 57 (1.4%)                       | 4 (1.5%)                                  | 17 (1.6%)                                          | 19 (1.4%)                              | 6 (0.9%)                                          | 6 (1.3%)                                          | 5 (1.3%)                                         |
| *2A                                                              | 43 (1.0%)                       | 3 (1.1%)                                  | 11 (1.0%)                                          | 14 (1.0%)                              | 8 (1.2%)                                          | 2 (0.4%)                                          | 5 (1.3%)                                         |
| *13A                                                             | 8 (0.2%)                        | 1 (0.4%)                                  | 3 (0.3%)                                           | 1 (<0.1%)                              | 1 (0.2%)                                          | 1 (0.2%)                                          | 1 (0.3%)                                         |
| Compound heterozygous                                            | 4 (<0.1%)                       | 0 (0%)                                    | 1 (<0.1%)                                          | 1 (<0.1%)                              | 2 (0.3%)                                          | 0 (0%)                                            | 0 (0%)                                           |
| <sup>1</sup> n (%)                                               |                                 |                                           |                                                    |                                        |                                                   |                                                   |                                                  |

<sup>1</sup> n (%)
