# Supplementary material
Source: publisher figshare collection journal article supplement (https://tandf.figshare.com/articles/dataset/_/21357341)

**Figure S1.** Distribution of uracil concentration across hospital laboratories. The red dotted line represents the cut-off value of 16 ng/ml.

Kruskal–Wallis  $p = 6.9\text{e-}13$

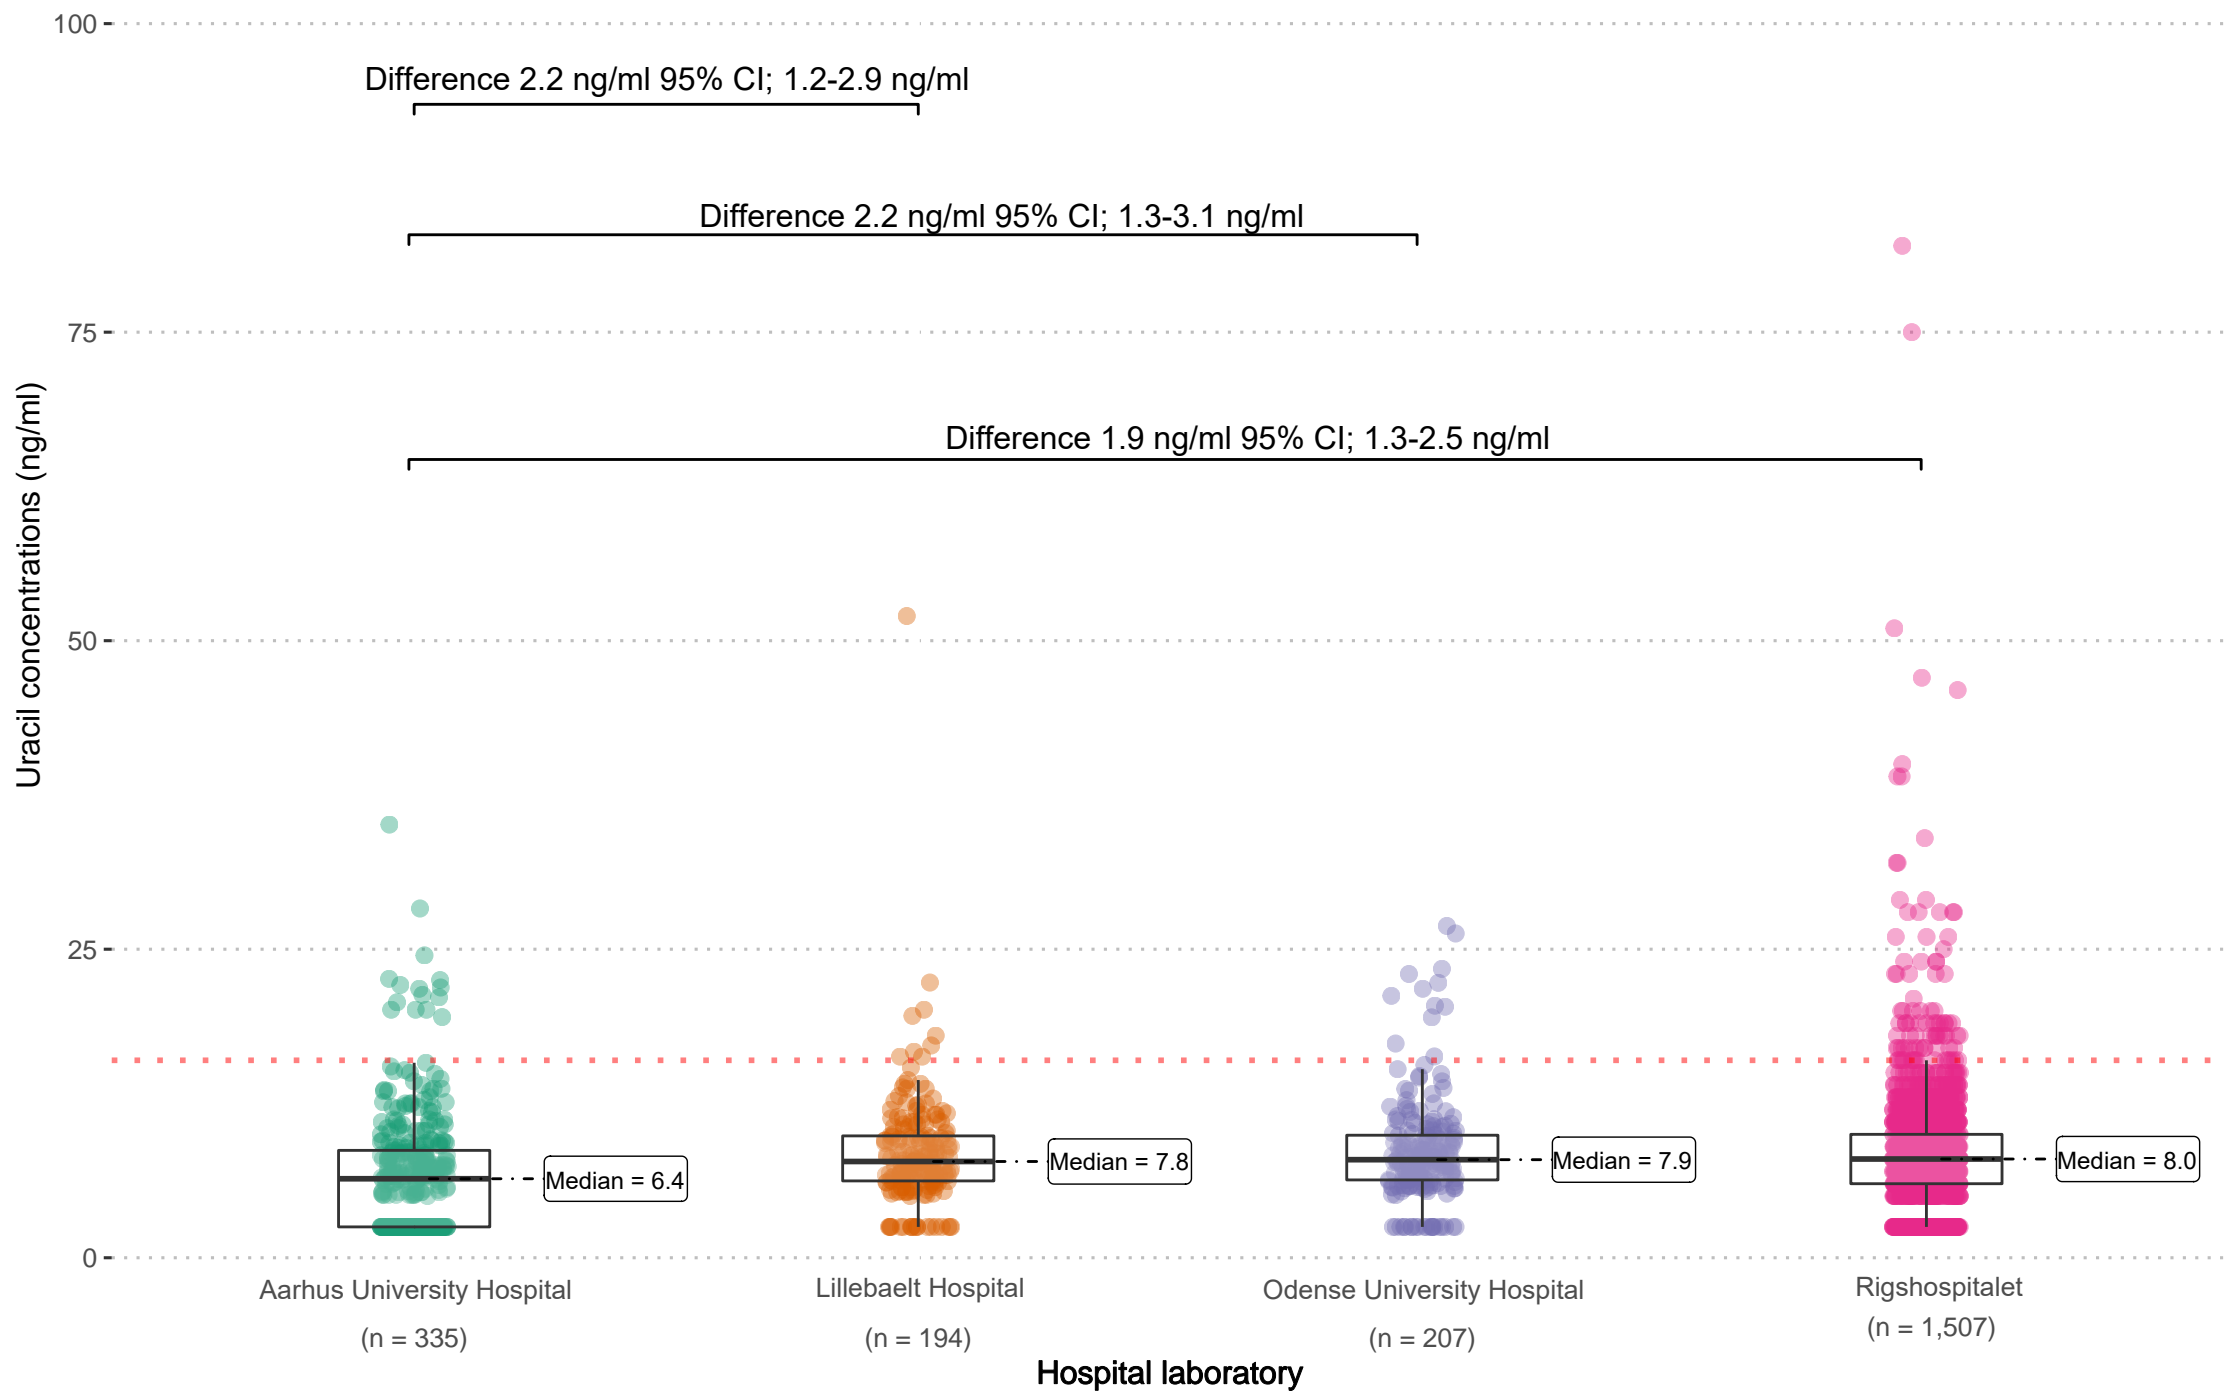

Supplement: Supplementary file 3 [file 1]
