# Supplementary material
Source: publisher figshare collection journal article supplement (https://tandf.figshare.com/articles/dataset/_/21357341)
Supplement: Supplementary file 4 [file 2]

**Supplementary Table 3.**

Phenotype cut-off values according to *DPYD*-genotype

| <i>DPYD</i> -genotype /<br>P-Uracil concentration | < 16 ng/ml  | ≥ 16 ng/ml &<br>< 150 ng/ml | ≥ 150 ng/ml | total |
|---------------------------------------------------|-------------|-----------------------------|-------------|-------|
| Wild type                                         | 1971(95.2%) | 99 (4.8%)                   | 0           | 2070  |
| Variant (heterozygous)                            | 141 (82.9%) | 29 (17.1%)                  | 0           | 170   |
| Compound heterozygous                             | 3 (100%)    | 0                           | 0           | 3     |
| Total                                             | 2115        | 128                         | 0           |       |
